# Obesity and Overweight in Relation to Mortality in Men With and Without Type 2 Diabetes/Impaired Glucose Tolerance

The original Whitehall Study

G. DAVID BATTY, PHD<sup>1</sup>  
MIKA KIVIMAKI, PHD<sup>2</sup>  
GEORGE DAVEY SMITH, MD<sup>3</sup>

MICHAEL G. MARMOT, FRCP<sup>2</sup>  
MARTIN J. SHIPLEY, MSC<sup>2</sup>

In studies of apparently healthy individuals, overweight and obesity, typically assessed using BMI, have been consistently associated with an increased risk of all-cause mortality, cardiovascular disease (CVD), and select cancers (1–4). However, extrapolating these results to individuals with type 2 diabetes is complex and perhaps inappropriate. Studies of the influence of obesity and overweight on mortality risk in individuals with type 2 diabetes reveal highly inconsistent findings. With all-cause mortality, obesity shows inverse (5,6), positive (7–10), null (11–16), and “J-” or “U-” shaped (17–19) associations; similarly discrepant results are apparent with coronary heart disease (CHD) (10,12,20,21). This discordance may be at least partially explained by methodological limitations in some studies, such as a modest sample size, a differential categorization of weight across studies, a tendency not to separate diabetes into its two main subtypes, and a failure to adjust for potentially important mediating and confounding variables. Using an extended follow-up of a U.K. prospective cohort study, we addressed this paucity of evidence and methodological shortcomings.

## RESEARCH DESIGN AND

**METHODS** — In the Whitehall Study, data were collected on 19,019 male gov-

ernment employees aged 40–69 years when examined between 1967 and 1970, representing a 74% response (22). Height and weight were measured using standard protocols, and BMI was computed (weight [kg]/height<sup>2</sup> [m<sup>2</sup>]) and categorized according to current guidelines (23): normal weight (18.5 to <25.0), over weight (25.0–29.99), and obesity (≥30.0 kg/m<sup>2</sup>).

After an overnight fast, capillary blood samples were drawn 2 h after consumption of a glucose preparation equivalent to 50 g anhydrous dextrose, and blood glucose concentration was estimated using the ferricyanide reduction micromethod on an autoanalyzer (Technicon method N-9a) (22). Using categories previously utilized in the Whitehall Study (24–26), diabetes was defined as blood glucose ≥11.1 mmol/l (≥200 mg/100 ml) and/or a positive response to the questionnaire enquiry “Are you, or have you been, diabetic?” Impaired glucose tolerance (IGT) was defined as 5.4–11.0 mmol/l (96–199 mg/100 ml). All other men were denoted normoglycemic. We excluded 48 men who reported that their diabetes was controlled by insulin medication (type 1 diabetes) and 135 whose status could not be ascertained due to missing data.

Preliminary analyses showed that the weight-mortality gradient in men with

IGT (*n* = 1,030) and in those with type 2 diabetes (*n* = 195) was very similar. That is, there was no suggestion that the all-cause weight-mortality relation differed between the IGT (hazard ratio [HR] per increase in weight category 1.12 [95% CI 1.00–1.25]) and diabetes group (1.19 [0.94–1.49], *P* = 0.64 for difference in gradient between groups). Similar results were apparent when CVD was the outcome of interest (*P* = 0.98). Therefore, we combined the IGT and type 2 diabetes groups, an approach we have taken elsewhere (26).

A total of 18,863 men (99.2% of participants in baseline survey) were traced using the National Health Service Central Registry until 30 September 2005. The present analyses are based on 18,360 individuals with complete data (679 men with missing continuous data had values imputed) (27). HRs and accompanying CIs were computed using Cox’s proportional hazards regression model, with the follow-up period as the time scale (28).

**RESULTS** — Relative to the normoglycemic group, there was an elevated risk of death from all-cause mortality (fully adjusted HR 1.26 [95% CI 1.18–1.35]), CVD (1.28 [1.17–1.41]), and, particularly, CHD (1.35 [1.20–1.50]) in men with diabetes/IGT. In examining the relation of BMI with mortality experience in men with diabetes/IGT (Table 1), the greatest age-adjusted risk of all-cause (1.61 [1.28–2.02]), CVD (1.92 [1.43–2.59]), and CHD (2.20 [1.57–3.14]) mortality was apparent in obese individuals. There was also an incremental effect across the weight groups (*P* ≤ 0.008, for trend). Control for a range of confounding and mediating factors led to some attenuation of these gradients. Very similar overweight/obesity-mortality relations were seen in men without type 2 diabetes/IGT (*P* ≥ 0.45, for interaction for gradients by diabetes status).

To explore the effect of unmeasured comorbidity at study induction, we related weight to mortality experience after

From the <sup>1</sup>Social and Public Health Sciences Unit, Medical Research Council, University of Glasgow, Glasgow, U.K.; the <sup>2</sup>Department of Epidemiology and Public Health, University College London, London, U.K.; and the <sup>3</sup>Department of Social Medicine, University of Bristol, Bristol, U.K.

Address correspondence and reprint requests to G. David Batty, Medical Research Council, Social and Public Health Sciences, 4 Lilybank Gardens, Glasgow, U.K., G12 8RZ. E-mail: david-b@msoc.mrc.gla.ac.uk.

Received for publication 12 February 2007 and accepted in revised form 29 May 2007.

Published ahead of print at <http://care.diabetesjournals.org> on 10 July 2007. DOI: 10.2337/dc07-0294.

**Abbreviations:** CVD, cardiovascular disease; CHD, coronary heart disease; IGT, impaired glucose tolerance. A table elsewhere in this issue shows conventional and Système International (SI) units and conversion factors for many substances.

© 2007 by the American Diabetes Association.

The costs of publication of this article were defrayed in part by the payment of page charges. This article must therefore be hereby marked “advertisement” in accordance with 18 U.S.C. Section 1734 solely to indicate this fact.

Table 1—Mortality rates and hazard ratios (95% CIs) for selected mortality outcomes in relation to obesity and overweight in men with and without type 2 diabetes/IGT in the original Whitehall Study

| Mortality outcome              | Normoglycemic (n = 17,135) |                  |                  |             | Diabetes /IGT (n = 1,225) |                  |                  |             |
|--------------------------------|----------------------------|------------------|------------------|-------------|---------------------------|------------------|------------------|-------------|
|                                | Normal weight              | Overweight       | Obese            | P for trend | Normal weight             | Overweight       | Obese            | P for trend |
| n                              | 9,398                      | 7,038            | 699              |             | 568                       | 562              | 95               |             |
| All causes*                    |                            |                  |                  |             |                           |                  |                  |             |
| Deaths                         | 6,367                      | 5,169            | 570              |             | 454                       | 453              | 88               |             |
| Mortality rate (age adjusted)† | 29.7                       | 31.0             | 37.2             |             | 35.9                      | 35.3             | 56.8             |             |
| Age adjusted                   | 1.0 (ref.)                 | 1.07 (1.03–1.11) | 1.43 (1.31–1.56) | <0.001      | 1.0 (ref.)                | 1.02 (0.89–1.16) | 1.61 (1.28–2.02) | 0.008       |
| Confounder adjusted‡           | 1.0                        | 1.09 (1.05–1.13) | 1.42 (1.30–1.53) | <0.001      | 1.0                       | 1.06 (0.93–1.21) | 1.45 (1.15–1.82) | 0.01        |
| Multiple adjusted§             | 1.0                        | 1.03 (0.99–1.07) | 1.26 (1.16–1.38) | <0.001      | 1.0                       | 0.99 (0.87–1.13) | 1.29 (1.02–1.62) | 0.20        |
| CVD                            |                            |                  |                  |             |                           |                  |                  |             |
| Deaths                         | 2,844                      | 2,604            | 314              |             | 225                       | 240              | 54               |             |
| Mortality rate (age adjusted)† | 13.4                       | 15.7             | 20.8             |             | 17.9                      | 18.8             | 26.5             |             |
| Age adjusted                   | 1.0                        | 1.20 (1.14–1.26) | 1.74 (1.55–1.95) | <0.001      | 1.0                       | 1.08 (0.90–1.30) | 1.92 (1.43–2.59) | 0.001       |
| Confounder adjusted‡           | 1.0                        | 1.22 (1.15–1.28) | 1.71 (1.52–1.92) | <0.001      | 1.0                       | 1.13 (0.94–1.35) | 1.79 (1.33–2.42) | 0.001       |
| Multiple adjusted§             | 1.0                        | 1.09 (1.03–1.15) | 1.40 (1.25–1.58) | <0.001      | 1.0                       | 1.02 (0.85–1.30) | 1.53 (1.13–2.07) | 0.05        |
| CHD                            |                            |                  |                  |             |                           |                  |                  |             |
| Deaths                         | 1,756                      | 1,670            | 205              |             | 142                       | 167              | 41               |             |
| Mortality rate (age adjusted)† | 8.2                        | 10.0             | 13.6             |             | 11.3                      | 13.2             | 20.9             |             |
| Age adjusted                   | 1.0                        | 1.25 (1.17–1.33) | 1.80 (1.56–2.08) | <0.001      | 1.0                       | 1.19 (0.95–1.49) | 2.20 (1.57–3.14) | <0.001      |
| Confounder adjusted‡           | 1.0                        | 1.26 (1.18–1.35) | 1.76 (1.52–2.03) | <0.001      | 1.0                       | 1.23 (0.99–1.54) | 2.10 (1.48–2.97) | <0.001      |
| Multiple adjusted§             | 1.0                        | 1.14 (1.06–1.22) | 1.47 (1.27–1.71) | <0.001      | 1.0                       | 1.12 (0.89–1.40) | 1.83 (1.29–2.59) | 0.006       |
| All cancers                    |                            |                  |                  |             |                           |                  |                  |             |
| Deaths                         | 1,854                      | 1,390            | 128              |             | 101                       | 94               | 16               |             |
| Mortality rate (age adjusted)† | 8.4                        | 8.2              | 8.3              |             | 8.0                       | 7.4              | 8.6              |             |
| Age adjusted                   | 1.0                        | 1.00 (0.93–1.07) | 1.10 (0.92–1.31) | 0.67        | 1.0                       | 0.95 (0.72–1.26) | 1.28 (0.76–2.18) | 0.72        |
| Confounder adjusted‡           | 1.0                        | 1.03 (0.96–1.10) | 1.12 (0.94–1.34) | 0.23        | 1.0                       | 0.98 (0.74–1.30) | 1.14 (0.67–1.94) | 0.81        |
| Multiple adjusted§             | 1.0                        | 1.02 (0.95–1.10) | 1.11 (0.92–1.33) | 0.34        | 1.0                       | 0.98 (0.74–1.29) | 1.11 (0.85–1.46) | 0.88        |

\*Forty-three men with unknown cause of death have been excluded from the cause-specific analyses. †Mortality rates are expressed per 1,000 person-years. ‡Confounder-adjusted model adjusted for age, employment grade, physical activity, smoking habit, marital status, disease at entry, and weight loss in the last year. §Multiple-adjusted model adjusted for all potential confounding variables (as above) plus blood pressure-lowering medication, height-adjusted forced expiratory volume in 1 s, systolic and diastolic blood pressure, and plasma cholesterol. ||Tests of interaction to determine if the linear trend across BMI categories was the same in normoglycemic subjects and men with diabetes/IGT. Disease categories utilized were: deaths due to CVD (ICD8/9, 390–458; ICD10, 100–199), CHD (ICD8/9, 410–414; ICD10, I20–I25), and all cancers (ICD-8, 140–208; ICD-9, 140–209; ICD-10, 140–208; C00–C97).

dropping data on deaths occurring within the first 10 years of mortality surveillance and after fitting interaction terms for the BMI categories with the logarithm of the follow-up time. In both cases, the weight-mortality relation was somewhat strengthened, particularly for non-CVD outcomes in the latter analyses.

**CONCLUSIONS**— In men with baseline diabetes/IGT, we found an elevated rate of all-cause, CVD, and CHD mortality in the obese and overweight groups. Our findings of a positive association between weight and all-cause mortality accords with some (6–10) if not all reports (5,6,11–16). (Note: The Verona Diabetes Study [6] found opposing weight-mortality gradients according to age-group [ $<65$  years and  $\geq 65$  years].) Similarly, other investigators (10,12,20) have reported an elevated risk of CVD or CHD in men with higher BMI, as we did; again, however, this is not a universal finding (21). The strength of the BMI-mortality gradient was essentially the same in men without diabetes/IGT. We found no strong suggestion of a link between BMI and all cancers in the diabetes/IGT group—to our knowledge, the first time this relation has been examined.

Confounding and selection bias may plausibly explain the associations reported herein. However, we controlled for a range of variables, and loss to follow-up was very low. Study weaknesses should be considered. First, the assessment of obesity and overweight was based on BMI, a widely used index of overall adiposity but one that does not provide an indication of fat distribution. Second, because weight, confounders, and mediators may fluctuate over time, it is preferable to have more than a single baseline measurement. However, in a recent resurvey of surviving members of this cohort (29), there were too few deaths in those with diabetes/IGT to examine this issue.

In conclusion, this study found support for an elevated risk of mortality from all causes, CVD, and CHD in obese or overweight middle-aged men with and without diabetes/IGT at study induction. Overweight or obesity should therefore be avoided in both these groups.

**Acknowledgments**— The original screening of the Whitehall Study was funded by the Department of Health and Social Security and the Tobacco Research Council.

G.D.B. is a Wellcome Trust fellow, M.G.M.

is a Medical Research Council research professor, M.S. is supported by the British Heart Foundation, and M.K. is supported by the Academy of Finland.

## References

- Batty GD, Shipley MJ, Jarrett RJ, Breeze E, Marmot MG, Davey Smith G: Obesity and overweight in relation to disease-specific mortality in men with and without existing coronary heart disease in London: the original Whitehall study. *Heart* 92:886–892, 2006
- Batty GD, Shipley MJ, Jarrett RJ, Breeze E, Marmot MG, Davey Smith G: Obesity and overweight in relation to organ-specific cancer mortality in London (UK): findings from the original Whitehall study. *Int J Obes (Lond)* 29:1267–1274, 2005
- Calle EE, Thun MJ, Petrelli JM, Rodriguez C, Heath CW Jr: Body-mass index and mortality in a prospective cohort of U.S. adults. *N Engl J Med* 341:1097–1105, 1999
- Calle EE, Rodriguez C, Walker-Thurmond K, Thun MJ: Overweight, obesity, and mortality from cancer in a prospectively studied cohort of U.S. adults. *N Engl J Med* 348:1625–1638, 2003
- Hodge AM, Dowse GK, Collins VR, Zimmet PZ: Mortality in Micronesian Nauruans and Melanesian and Indian Fijians is not associated with obesity. *Am J Epidemiol* 143:442–455, 1996
- Zoppini G, Verlato G, Leuzinger C, Zamboni C, Brun E, Bonora E, Muggeo M: Body mass index and the risk of mortality in type II diabetic patients from Verona. *Int J Obes Relat Metab Disord* 27:281–285, 2003
- Pettitt DJ, Lisse JR, Knowler WC, Bennett PH: Mortality as a function of obesity and diabetes mellitus. *Am J Epidemiol* 115:359–366, 1982
- Wedick NM, Barrett-Connor E, Knoke JD, Wingard DL: The relationship between weight loss and all-cause mortality in older men and women with and without diabetes mellitus: the Rancho Bernardo study. *J Am Geriatr Soc* 50:1810–1815, 2002
- Church TS, Cheng YJ, Earnest CP, Barlow CE, Gibbons LW, Priest EL, Blair SN: Exercise capacity and body composition as predictors of mortality among men with diabetes. *Diabetes Care* 27:83–88, 2004
- Hu G, Jousilahti P, Barengo NC, Qiao Q, Lakka TA, Tuomilehto J: Physical activity, cardiovascular risk factors, and mortality among Finnish adults with diabetes. *Diabetes Care* 28:799–805, 2005
- Fitzgerald AP, Jarrett RJ: Are conventional risk factors for mortality relevant in type 2 diabetes. *Diabetes Med* 8:475–480, 1991
- Ford ES, DeStefano F: Risk factors for mortality from all causes and from coronary heart disease among persons with diabetes: findings from the National Health and Nutrition Examination Survey I Epidemiologic Follow-up Study. *Am J Epidemiol* 133:1220–1230, 1991
- Balkau B, Eschwege E, Papoz L, Richard JL, Claude JR, Warnet JM, Ducimetiere P: Risk factors for early death in non-insulin dependent diabetes and men with known glucose tolerance status. *BMJ* 307:295–299, 1993
- Walters DP, Gatling W, Houston AC, Mullee MA, Julious SA, Hill RD: Mortality in subjects: an eleven-year follow-up of community-based population. *Diabetes Med* 11:968–973, 1994
- Chaturvedi N, Fuller JH: Mortality risk by body weight and weight change in people with NIDDM: the WHO Multinational Study of Vascular Disease in Diabetes. *Diabetes Care* 18:766–774, 1995
- Turner RC, Millns H, Neil HA, Stratton IM, Manley SE, Matthews DR, Holman RR: Risk factors for coronary artery disease in non-insulin dependent diabetes mellitus: United Kingdom Prospective Diabetes Study (UKPDS: 23). *BMJ* 316:823–828, 1998
- Schneider H, Lischinski M, Jutzi E: Survival time after onset of diabetes: 29-year follow-up mortality study in a diabetes cohort from a rural district. *Diabetes Metab* 19:152–158, 1993
- Ross C, Langer RD, Barrett-Connor E: Given diabetes, is fat better than thin? *Diabetes Care* 20:650–652, 1997
- Mulnier HE, Seaman HE, Raleigh VS, Soedamah-Muthu SS, Colhoun HM, Lawrenson RA: Mortality in people with type 2 diabetes in the UK. *Diabet Med* 23:516–521, 2006
- Cho E, Manson JE, Stampfer MJ, Solomon CG, Colditz GA, Speizer FE, Willett WC, Hu FB: A prospective study of obesity and risk of coronary heart disease among diabetic women. *Diabetes Care* 25:1142–1148, 2002
- Rosengren A, Welin L, Tsipogianni A, Wilhelmsen L: Impact of cardiovascular risk factors on coronary heart disease and mortality among middle aged diabetic men: a general population study. *BMJ* 299:1127–1131, 1989
- Reid DD, Hamilton PJS, McCartney P, Rose G, Jarrett RJ, Keen H, Rose G: Cardiorespiratory disease and diabetes among middle-aged male civil servants. *Lancet* i:469–473, 1974
- The World Health Organization: *Physical Status: The Use and Interpretation of Anthropometry: Report of a WHO Expert Committee*. Geneva, World Health Org., 1995 (Tech. Rep. Ser. 854)
- Fuller JH, Shipley MJ, Rose G, Jarrett RJ, Keen H: Coronary-heart-disease risk and impaired glucose tolerance: the Whitehall study. *Lancet* i:1373–1376, 1980
- Batty GD, Shipley MJ, Marmot M, Davey

- Smith G: Diabetes status and post-load plasma glucose concentration in relation to site-specific cancer mortality: findings from the original Whitehall study. *Cancer Causes Control* 15:873–881, 2004
26. Batty GD, Shipley MJ, Marmot M, Davey Smith G: Physical activity and cause-specific mortality in men with type 2 diabetes/impaired glucose tolerance: evidence from the Whitehall study. *Diabet Med* 19: 580–588, 2002
  27. Schaefer J: *Analysis of Incomplete Multivariate Data*. New York, Chapman and Hall, 1997
  28. Cox DR: Regression models and life-tables. *J R Stat Soc* 34:187–220, 1972
  29. Breeze E, Clarke R, Shipley MJ, Marmot MG, Fletcher AE: Cause-specific mortality in old age in relation to body mass index in middle age and in old age: follow-up of the Whitehall cohort of male civil servants. *Int J Epidemiol* 35:169–178, 2006
